# Supplementary material for: High-performance Ag0.333V2O5 nanowires as cathode materials for aqueous zinc-ion batteries
Source: Royal Society of Chemistry journal article supplement (doi:10.1039/d6ra01786j), 2026-04-13
Supplement: d6ra01786j1.pdf [file d6ra01786j1.pdf]

## High-Performance $\text{Ag}_{0.333}\text{V}_2\text{O}_5$ Nanowires as Cathode Materials for Aqueous Zinc-Ion Batteries

Yimeng Xu,<sup>\*ac</sup> Junyu Qu<sup>ab</sup> Xunna Ke<sup>ab</sup> Hongrui Jiang<sup>ab</sup> and Ali

Bahadur<sup>\*ab</sup>

---

<sup>a.</sup> *College of Science, Mathematics, and Technology, Wenzhou-Kean University, Wenzhou 325060, Zhejiang Province, China.*

*E-mail: [xuyimeng@wku.edu.cn](mailto:xuyimeng@wku.edu.cn), [Abahadur@wku.edu.cn](mailto:Abahadur@wku.edu.cn)*

<sup>b.</sup> *Dorothy and George Hennings College of Science, Mathematics and Technology, Kean University, 1000 Morris Ave, Union NJ 07083, USA.*

<sup>c.</sup> *Wenzhou-Kean University Chemical Materials Research Center.*

*\*Co-corresponding*

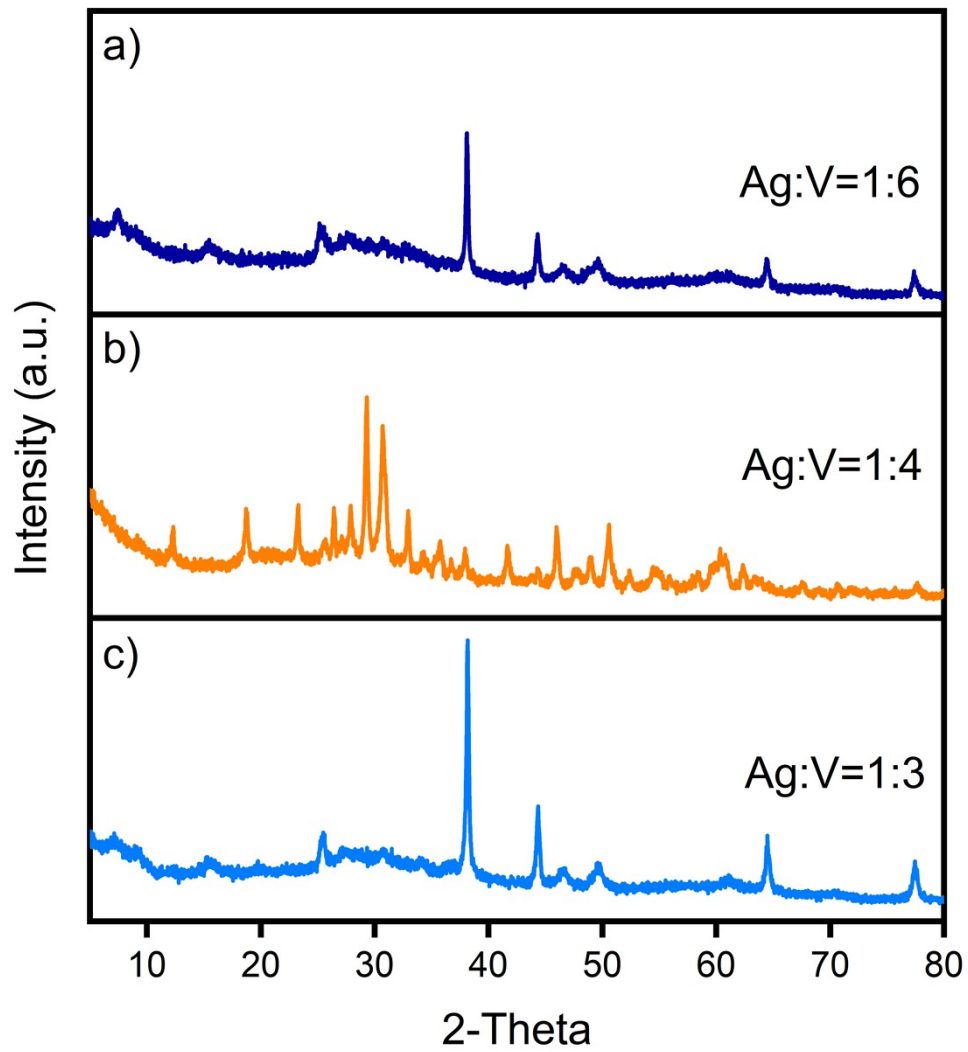

Fig.S1. XRD patterns of samples obtained at different precursor ratios  
(Ag:V=1:6, 1:4, 1:3)

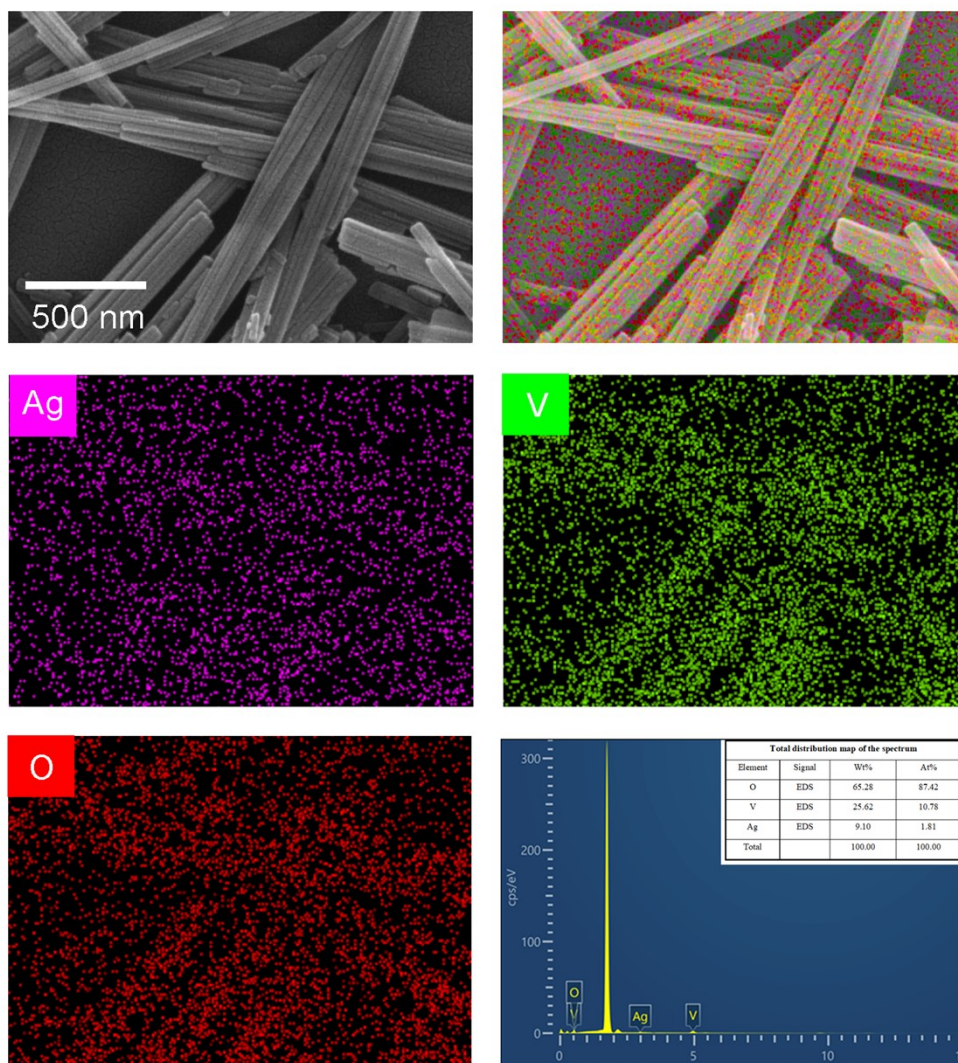

Fig. S2 SEM and elemental mappings of Ag, V, O

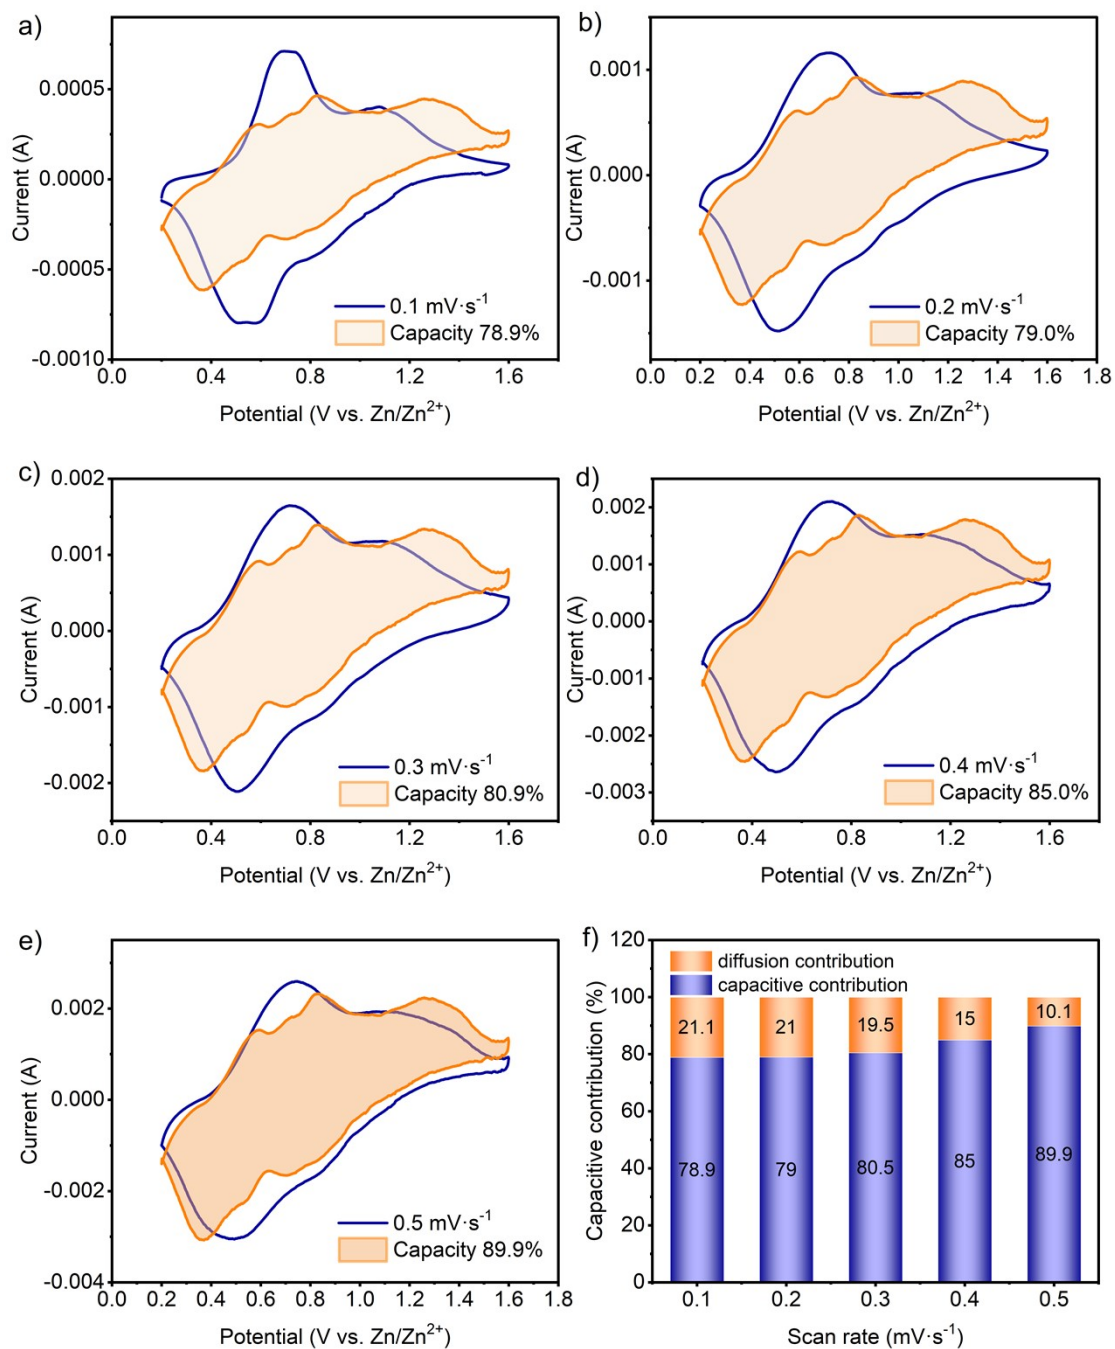

Fig. S3 (a-e) Capacitive contribution of  $\text{Ag}_{0.333}\text{V}_2\text{O}_5$  electrode at 0.1, 0.2, 0.3, 0.4, 0.5  $\text{mV}\cdot\text{s}^{-1}$ . (f) Pseudocapacitance contribution of  $\text{Ag}_{0.333}\text{V}_2\text{O}_5$  at various scan rates

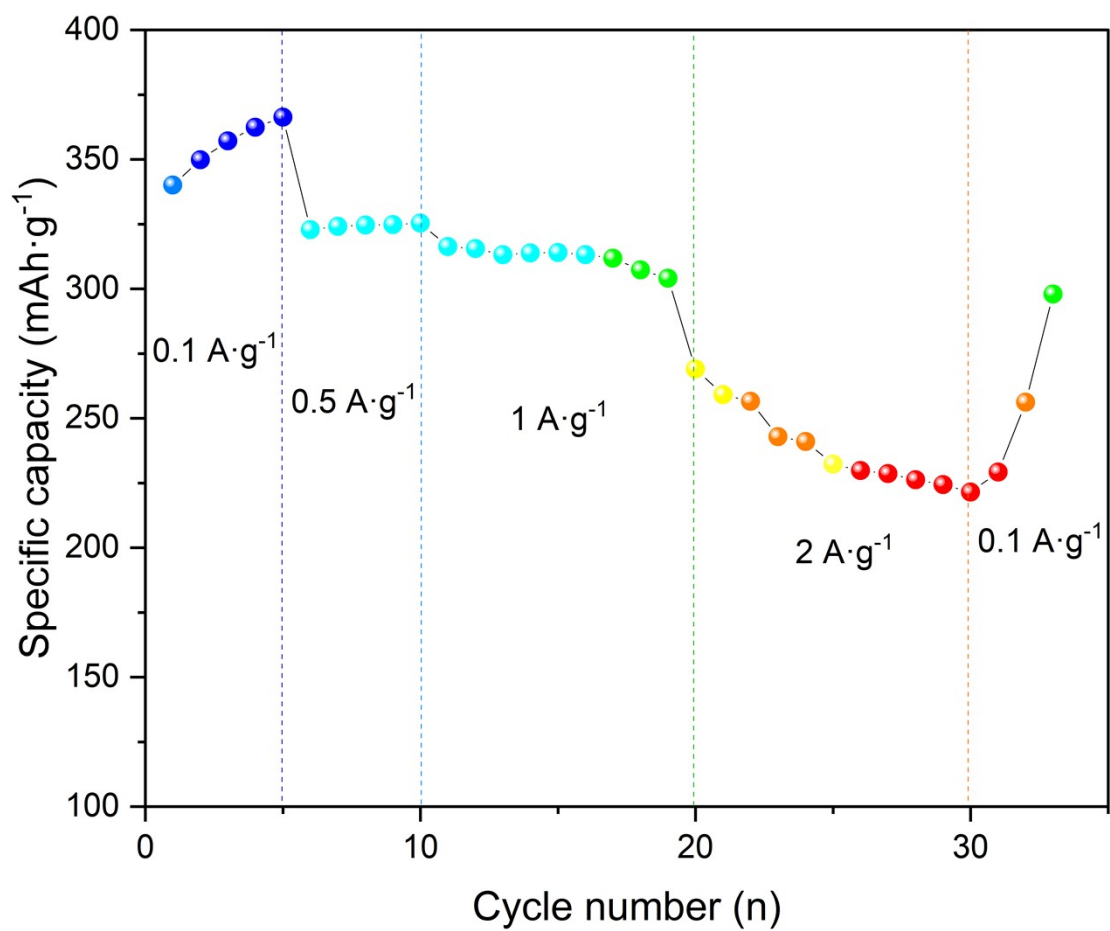

Fig. S4 Rate performance of  $\text{Ag}_{0.333}\text{V}_2\text{O}_5$
